# Supplementary material for: Rates of contributory de novo mutation in high and low-risk autism families
Source: Commun Biol. 2021 Sep 1;4:1026. doi: 10.1038/s42003-021-02533-z (PMC8410909; doi:10.1038/s42003-021-02533-z)
Supplement: Supplementary file 6 — Supplementary Data 4 [file 42003_2021_2533_MOESM6_ESM.xlsx]

## Sheet: De novo CNV in SSC and AGRE
UCSCLink	collection	familyId	in affected status	personIds	location	variant	size	publicaton	genomic region	number of genes	genes
LINK	SSC	12613	affected	12613.p1	chr1:1305145-1314126	duplication	8982		coding	3	ACAP3,INTS11,PUSL1
LINK	AGRE	AU2725202_AU2725201	affected	AU2725301	chr1:3069177-4783791	duplication	1714615		coding	13	AJAP1,ARHGEF16,C1orf174,CCDC27,CEP104,DFFB,LRRC47,MEGF6,PRDM16,SMIM1,TP73,TPRG1L,WRAP73
LINK	SSC	13424	unaffected	13424.s1	chr1:3975501-3977800	deletion	2300		intergenic	0
LINK	SSC	12852	affected	12852.p1	chr1:6647401-6650500	deletion	3100		inter-coding_intronic	1	DNAJC11
LINK	SSC	13776	affected	13776.p1	chr1:8652301-8657600	deletion	5300		coding	1	RERE
LINK	SSC	13373	unaffected	13373.s1	chr1:9992001-9994100	deletion	2100		intergenic	0
LINK	SSC	14198	affected	14198.p1	chr1:12224601-12227300	deletion	2700		intergenic	0
LINK	SSC	13259	affected	13259.p1	chr1:15687701-15696200	deletion	8500		inter-coding_intronic	1	PLEKHM2
LINK	SSC	14696	unaffected	14696.s1	chr1:30388501-30398807	deletion	10307		intergenic	0
LINK	SSC	14534	affected	14534.p1	chr1:40513501-40534200	deletion	20700	Sanders 2015	coding	2	EXO5,ZNF684
LINK	SSC	14534	unaffected	14534.s1	chr1:40513501-40534200	deletion	20700	Sanders 2015	coding	2	EXO5,ZNF684
LINK	SSC	13447	unaffected	13447.s1	chr1:48141901-48243413	duplication	101513		coding	1	SLC5A9
LINK	SSC	13812	affected	13812.p1	chr1:49846201-49848300	duplication	2100		inter-coding_intronic	1	AGBL4
LINK	SSC	12021	affected	12021.p1	chr1:62652201-62703647	deletion	51447	Sanders 2015	coding	1	DOCK7
LINK	SSC	14697	affected	14697.p1	chr1:90083801-90095600	deletion	11800		intergenic	0
LINK	SSC	13346	affected	13346.p1	chr1:93078701-105286800	deletion	5439000	Sanders 2015	coding	49	ABCA4,ABCD3,AGL,ALG14,AMY1A,AMY1B,AMY1C,AMY2A,AMY2B,ARHGAP29,BCAR3,CCDC18,CDC14A,CNN3,COL11A1,DBT,DNTTIP2,DPH5,DPYD,DR1,EXTL2,F3,FNBP1L,FRRS1,GCLM,GPR88,LOC101928436,LRRC39,MFSD14A,MTF2,OLFM3,PALMD,PLPPR4,PLPPR5,PTBP2,RNPC3,RTCA,RWDD3,S1PR1,SASS6,SLC30A7,SLC35A3,SLC44A3,SNX7,TMED5,TMEM56,TMEM56-RWDD3,TRMT13,VCAM1
LINK	SSC	13649	unaffected	13649.s1	chr1:108817301-108819500	deletion	2200		inter-coding_intronic	1	AKNAD1
LINK	SSC	13346	affected	13346.p1	chr1:112016501-112981398	deletion	964898	Sanders 2015	coding	9	CAPZA1,CTTNBP2NL,FAM19A3,MOV10,PPM1J,RHOC,SLC16A1,ST7L,WNT2B
LINK	SSC	11989	unaffected	11989.s1	chr1:202771301-202773900	deletion	2600		coding	1	KDM5B
LINK	AGRE	AU3777202_AU3777201	affected	AU3777303	chr1:211712814-211722346	deletion	9533		intergenic	0
LINK	SSC	13971	unaffected	13971.s1	chr1:218504701-218549300	deletion	44600		noncoding	2	C1orf143,MIR548F3
LINK	SSC	12010	unaffected	12010.s1	chr1:223986001-223996000	deletion	10000		noncoding	2	GTF2IP20,LOC100287497
LINK	AGRE	AU2997202_AU2997201	affected	AU2997301	chr1:225968501-226068899	duplication	100400		coding	2	H3F3A,SDE2
LINK	SSC	12161	affected	12161.p1	chr1:226785001-226793000	deletion	8000		intergenic	0
LINK	SSC	13876	affected	13876.p1	chr1:238725802-238755482	duplication	24099		intergenic	0
LINK	SSC	13061	affected	13061.p1	chr1:240305480-240314000	deletion	8521		inter-coding_intronic	1	FMN2
LINK	SSC	11110	affected	11110.p1	chr1:243067890-243110800	deletion	42911		noncoding	1	LINC01347
LINK	AGRE	AU1197202_AU1197201	affected	AU1197302	chr1:244569799-244572298	deletion	2500		inter-coding_intronic	1	CATSPERE
LINK	SSC	13147	affected	13147.p1	chr2:23810134-23828103	deletion	17970		coding	1	ATAD2B
LINK	SSC	14362	affected	14362.p1	chr2:27179001-27185300	deletion	6300		intergenic	0
LINK	SSC	14008	affected	14008.p1	chr2:29052901-29060900	deletion	8000		intergenic	0
LINK	SSC	13836	affected	13836.p1	chr2:43524901-43527700	duplication	2800		inter-coding_intronic	1	THADA
LINK	SSC	11152	affected	11152.p1	chr2:47603301-47613900	deletion	10600	Sanders 2015	intergenic	0
LINK	SSC	13962	affected	13962.p1	chr2:50562601-51028500	deletion	465900	Sanders 2015	coding	1	NRXN1
LINK	SSC	13580	affected	13580.p1	chr2:51015001-51084500	deletion	69500	Sanders 2015	coding	1	NRXN1
LINK	SSC	13493	affected	13493.p1	chr2:52851901-53053700	duplication	201800	Sanders 2015	intergenic	0
LINK	SSC	13629	unaffected	13629.s1	chr2:61272127-61311400	duplication	39274		coding	1	USP34
LINK	AGRE	AU3768202_AU3768201	affected	AU3768303	chr2:84642177-84645176	deletion	3000		inter-coding_intronic	1	DNAH6
LINK	SSC	11407	unaffected	11407.s1	chr2:85311701-85314200	deletion	2500		intergenic	0
LINK	AGRE	AU1586202_AU1586201	affected	AU1586303	chr2:98330638-98333137	duplication	2500		intergenic	0
LINK	AGRE	AU055301_AU055302	affected	AU055304	chr2:131264581-131627233	deletion	362653		coding	5	CCDC74A,MZT2A,POTEE,RAB6D,TUBA3D
LINK	AGRE	AU2139202_AU2139201	affected	AU2139304	chr2:137689231-137693930	deletion	4700		intergenic	0
LINK	AGRE	AU1223202_AU1223201	affected	AU1223302	chr2:149511687-149515015	deletion	3329		intergenic	0
LINK	AGRE	AU2793202_AU2793201	affected	AU2793301	chr2:154003588-154005587	duplication	2000		inter-coding_intronic	1	GALNT13
LINK	SSC	13016	unaffected	13016.s1	chr2:160804701-160808000	deletion	3300		intergenic	0
LINK	SSC	13302	affected	13302.p1	chr2:169874601-169886300	deletion	11700		coding	1	UBR3
LINK	SSC	14415	affected	14415.p1	chr2:189113201-189135544	deletion	22344		inter-coding_intronic	1	COL5A2
LINK	SSC	13504	unaffected	13504.s1	chr2:208805901-208817200	deletion	11300		noncoding	1	LOC101927960
LINK	SSC	12861	unaffected	12861.s1	chr2:215277001-215283733	deletion	6733		intergenic	0
LINK	SSC	11046	affected	11046.p1	chr3:4116701-4837700	deletion	721000	Sanders 2015	coding	3	ITPR1,SETMAR,SUMF1
LINK	SSC	11046	affected	11046.p1	chr3:4996799-5010099	duplication	13301		intergenic	0
LINK	SSC	14210	affected	14210.p1	chr3:22991601-22995300	deletion	3700		intergenic	0
LINK	SSC	11838	affected	11838.p1	chr3:27492401-27514200	deletion	21800		intergenic	0
LINK	SSC	14662	affected	14662.p1	chr3:30796201-30800100	deletion	3900		inter-coding_intronic	1	GADL1
LINK	SSC	11696	affected	11696.p1	chr3:37236601-37409137	deletion	172537	Sanders 2015	coding	1	GOLGA4
LINK	SSC	14590	affected	14590.p1	chr3:60854801-60857200	duplication	2400		peripheral	1	FHIT
LINK	AGRE	AU2317202_AU2317201	affected	AU2317301	chr3:60960929-60991128	deletion	30200		peripheral	1	FHIT
LINK	SSC	12032	affected	12032.p1	chr3:67083420-72210353	deletion	5126934	Sanders 2015	coding	15	ARL6IP5,EIF4E3,EOGT,FAM19A1,FAM19A4,FOXP1,FRMD4B,GPR27,LMOD3,MDFIC2,MITF,PROK2,SUCLG2,TMF1,UBA3
LINK	SSC	13649	affected	13649.p1	chr3:68718401-68721900	duplication	3500		intergenic	0
LINK	SSC	11479	affected	11479.p1	chr3:80527601-80555800	deletion	28200	Sanders 2015	intergenic	0
LINK	SSC	11227	affected	11227.p1	chr3:105250701-105329648	deletion	78948	Sanders 2015	intergenic	0
LINK	AGRE	AU0911202_AU0911201	affected	AU0911302	chr3:124759554-126072144	duplication	1312591	Leppa 2016	coding	10	ALG1L,HEG1,ITGB5,MUC13,OSBPL11,ROPN1B,SLC12A8,SLC41A3,SNX4,ZNF148
LINK	AGRE	AU1953202_AU1953201	affected	AU1953302	chr3:126692258-126694457	duplication	2200		intergenic	0
LINK	SSC	13095	unaffected	13095.s1	chr3:129465801-129467800	deletion	2000		coding	1	IFT122
LINK	SSC	13348	unaffected	13348.s1	chr3:135586728-135768700	duplication	181973	Sanders 2015	intergenic	0
LINK	SSC	11611	affected	11611.p1	chr3:140901248-140907406	deletion	6159		intergenic	0
LINK	SSC	11450	affected	11450.p1	chr3:164452101-164471813	deletion	19713	Sanders 2015	intergenic	0
LINK	AGRE	AU1365202_AU1365201	affected	AU1365301	chr3:186782912-186788211	deletion	5300		coding	1	EIF4A2
LINK	SSC	14595	affected	14595.p1	chr3:195986227-197654159	deletion	1667933	Sanders 2015	coding	22	BDH1,CEP19,DLG1,FBXO45,MELTF,NCBP2,NCBP2-AS2,NRROS,PAK2,PCYT1A,PIGX,PIGZ,RNF168,SENP5,SLC51A,SMCO1,TCTEX1D2,TFRC,TM4SF19,UBXN7,WDR53,ZDHHC19
LINK	SSC	11079	affected	11079.p1	chr3:195990717-197630600	deletion	1639884	Sanders 2015	coding	22	BDH1,CEP19,DLG1,FBXO45,MELTF,NCBP2,NCBP2-AS2,NRROS,PAK2,PCYT1A,PIGX,PIGZ,RNF168,SENP5,SLC51A,SMCO1,TCTEX1D2,TFRC,TM4SF19,UBXN7,WDR53,ZDHHC19
LINK	SSC	13064	affected	13064.p1	chr3:195996901-197634900	deletion	1638000	Sanders 2015	coding	22	BDH1,CEP19,DLG1,FBXO45,MELTF,NCBP2,NCBP2-AS2,NRROS,PAK2,PCYT1A,PIGX,PIGZ,RNF168,SENP5,SLC51A,SMCO1,TCTEX1D2,TFRC,TM4SF19,UBXN7,WDR53,ZDHHC19
LINK	SSC	14370	affected	14370.p1	chr4:1164464-1170615	duplication	6152		coding	1	SPON2
LINK	SSC	12399	affected	12399.p1	chr4:3436401-3443200	deletion	6800		coding	2	HGFAC,RGS12
LINK	SSC	14370	affected	14370.p1	chr4:7049816-7056982	duplication	7167		coding	1	TADA2B
LINK	SSC	14129	affected	14129.p1	chr4:7998801-8004100	deletion	5300		inter-coding_intronic	1	ABLIM2
LINK	SSC	13136	unaffected	13136.s1	chr4:23361536-23368416	deletion	6881		intergenic	0
LINK	SSC	12674	affected	12674.p1	chr4:36611031-36623697	deletion	12667		noncoding	1	LINC02505
LINK	SSC	12962	unaffected	12962.s1	chr4:39589901-39603000	deletion	13100		inter-coding_intronic	1	SMIM14
LINK	SSC	12661	affected	12661.p1	chr4:40451701-40457100	deletion	5400		peripheral	1	RBM47
LINK	SSC	11546	unaffected	11546.s1	chr4:54790001-54793200	deletion	3200		intergenic	0
LINK	SSC	14225	affected	14225.p1	chr4:65506601-65513400	deletion	6800		inter-coding_intronic	1	EPHA5
LINK	SSC	12134	unaffected	12134.s1	chr4:92123601-92127000	deletion	3400		intergenic	0
LINK	SSC	12329	unaffected	12329.s1	chr4:92877601-92920200	deletion	42600	Sanders 2015	inter-coding_intronic	1	GRID2
LINK	SSC	13666	affected	13666.p1	chr4:93122101-93158900	deletion	36800	Sanders 2015	inter-coding_intronic	1	GRID2
LINK	SSC	11920	unaffected	11920.s1	chr4:143884601-144124900	deletion	240300	Sanders 2015	coding	3	GYPA,GYPB,GYPE
LINK	SSC	13088	unaffected	13088.s1	chr4:167755401-167771100	duplication	15700		intergenic	0
LINK	AGRE	AU1782202_AU1782201	affected	AU1782301	chr4:175488950-175499049	deletion	10100		intergenic	0
LINK	SSC	14535	unaffected	14535.s1	chr4:182708701-184116300	duplication	1407600	Sanders 2015	coding	11	CDKN2AIP,CLDN22,CLDN24,DCTD,ENPP6,ING2,RWDD4,STOX2,TENM3,TRAPPC11,WWC2
LINK	SSC	14477	affected	14477.p1	chr5:4933501-4946500	deletion	13000		intergenic	0
LINK	SSC	13204	unaffected	13204.s1	chr5:11200501-11203900	deletion	3400		inter-coding_intronic	1	CTNND2
LINK	SSC	12289	affected	12289.p1	chr5:11351101-11439455	deletion	88355	Sanders 2015	coding	1	CTNND2
LINK	SSC	14661	unaffected	14661.s1	chr5:16419901-16425100	duplication	5200		noncoding	1	LINC02150
LINK	SSC	12888	unaffected	12888.s1	chr5:22287201-22551425	deletion	264225	Sanders 2015	peripheral	1	CDH12
LINK	AGRE	AU1218202_AU1218201	affected	AU1218302	chr5:31859183-31865088	deletion	5906		inter-coding_intronic	1	PDZD2
LINK	SSC	14532	affected	14532.p1	chr5:35979301-38224100	duplication	2244800	Sanders 2015	coding	12	CPLANE1,GDNF,LMBRD2,NADK2,NIPBL,NUP155,RANBP3L,SKP2,SLC1A3,UGT3A1,UGT3A2,WDR70
LINK	SSC	12572	unaffected	12572.s1	chr5:46340601-46363650	duplication	23050		intergenic	0
LINK	SSC	12369	unaffected	12369.s1	chr5:62944601-62952300	deletion	7700		intergenic	0
LINK	SSC	13737	affected	13737.p1	chr5:67758301-67762000	deletion	3700		intergenic	0
LINK	SSC	12575	unaffected	12575.s1	chr5:72334394-72356874	deletion	22481		coding	1	PTCD2
LINK	SSC	13230	affected	13230.p1	chr5:76307201-76309400	deletion	2200		inter-coding_intronic	1	SV2C
LINK	SSC	11027	affected	11027.p1	chr5:76722601-76726000	deletion	3400		inter-coding_intronic	1	F2R
LINK	SSC	12552	affected	12552.p1	chr5:82805501-82809500	deletion	4000		intergenic	0
LINK	SSC	11642	affected	11642.p1	chr5:86381447-86395303	deletion	13857	Sanders 2015	intergenic	0
LINK	SSC	14151	affected	14151.p1	chr5:97011101-97016200	deletion	5100		coding	1	LNPEP
LINK	AGRE	AU3199202_AU3199201	affected	AU3199301	chr5:112510204-112531303	deletion	21100		intergenic	0
LINK	AGRE	AU1757202_AU1757201	affected	AU1757302	chr5:119059006-119115805	deletion	56800		coding	1	DMXL1
LINK	SSC	12373	unaffected	12373.s1	chr5:120588071-120672600	deletion	84530	Sanders 2015	peripheral	1	PRR16
LINK	AGRE	AU3143202_AU3143201	affected	AU3143304	chr5:134600911-134728410	deletion	127500		coding	2	SAR1B,SEC24A
LINK	SSC	14478	affected	14478.p1	chr5:138101001-138808800	duplication	707800	Sanders 2015	coding	13	BRD8,CDC23,CDC25C,CTNNA1,EGR1,ETF1,FAM53C,GFRA3,HSPA9,KDM3B,KIF20A,NME5,REEP2
LINK	SSC	13773	unaffected	13773.s1	chr5:149654201-149656800	deletion	2600		intergenic	0
LINK	SSC	13307	unaffected	13307.s1	chr5:178602222-178612400	duplication	10179		coding	1	CLK4
LINK	SSC	14016	unaffected	14016.s1	chr6:1744903-2450672	duplication	697200	Sanders 2015	coding	1	GMDS
LINK	SSC	13210	affected	13210.p1	chr6:34607301-34800800	duplication	193500		coding	3	C6orf106,SNRPC,UHRF1BP1
LINK	AGRE	AU3646202_AU3646201	affected	AU3646302	chr6:35915827-35974019	deletion	43289		coding	2	SLC26A8,SRPK1
LINK	AGRE	AU3646202_AU3646201	affected	AU3646301	chr6:35916353-35973530	deletion	42274		coding	2	SLC26A8,SRPK1
LINK	SSC	14514	affected	14514.p1	chr6:67114901-67122500	deletion	7600		intergenic	0
LINK	SSC	13753	affected	13753.p1	chr6:67141701-67147600	deletion	5900		intergenic	0
LINK	SSC	14404	affected	14404.p1	chr6:73390797-73398500	deletion	7704		coding	1	DDX43
LINK	AGRE	AU1988202_AU1988201	affected	AU1988302	chr6:73688578-73696777	deletion	8200		coding	1	CD109
LINK	SSC	12775	affected	12775.p1	chr6:76977858-76986825	deletion	8968		intergenic	0
LINK	SSC	14127	affected	14127.p1	chr6:83647501-83650700	duplication	3200		inter-coding_intronic	1	SNAP91
LINK	AGRE	AU1756202_AU1756201	affected	AU1756303	chr6:110666098-110668997	deletion	2900		coding	1	CDK19
LINK	SSC	14467	unaffected	14467.s1	chr6:110879219-111020192	duplication	140974		coding	3	AMD1,GTF3C6,RPF2
LINK	AGRE	AU1756202_AU1756201	affected	AU1756302	chr6:118380438-118386037	deletion	5600		intergenic	0
LINK	SSC	12610	affected	12610.p1	chr6:137801001-137803000	deletion	2000		intergenic	0
LINK	SSC	13478	affected	13478.p1	chr6:140863801-140980500	duplication	116700	Sanders 2015	intergenic	0
LINK	SSC	14533	unaffected	14533.s1	chr6:155146501-155157200	deletion	10700		coding	1	TIAM2
LINK	SSC	14609	affected	14609.p1	chr6:156330186-157547584	deletion	1217399	Sanders 2015	coding	3	ARID1B,TMEM242,ZDHHC14
LINK	SSC	13928	affected	13928.p1	chr6:157178001-157192200	deletion	14200		coding	1	ARID1B
LINK	SSC	13886	unaffected	13886.s1	chr7:1055901-1062000	deletion	6100		coding	1	GPR146
LINK	SSC	14189	affected	14189.p1	chr7:1196801-1300477	duplication	103677		coding	1	UNCX
LINK	SSC	11031	unaffected	11031.s1	chr7:6898224-6950135	deletion	51912		intergenic	0
LINK	SSC	14240	affected	14240.p1	chr7:8738001-8796830	deletion	58830	Sanders 2015	coding	1	NXPH1
LINK	SSC	13875	unaffected	13875.s1	chr7:11722601-11885600	deletion	163000	Sanders 2015	coding	1	THSD7A
LINK	AGRE	AU1542202_AU1542201	affected	AU1542304	chr7:38340300-38343699	deletion	3400		noncoding	1	TRG-AS1
LINK	SSC	12394	affected	12394.p1	chr7:39058001-39061000	deletion	3000		inter-coding_intronic	1	POU6F2
LINK	SSC	11868	affected	11868.p1	chr7:67457001-67618800	duplication	161800		intergenic	0
LINK	SSC	12313	unaffected	12313.s1	chr7:68825901-68829400	deletion	3500		intergenic	0
LINK	SSC	12821	affected	12821.p1	chr7:70070701-70143300	deletion	72600		coding	1	AUTS2
LINK	SSC	12955	affected	12955.p1	chr7:73240499-74739238	duplication	1489525	Sanders 2015	coding	25	ABHD11,BAZ1B,BCL7B,BUD23,CLDN3,CLDN4,CLIP2,DNAJC30,EIF4H,ELN,FKBP6,FZD9,GTF2I,GTF2IRD1,LAT2,LIMK1,METTL27,MLXIPL,NSUN5,RFC2,STX1A,TBL2,TMEM270,TRIM50,VPS37D
LINK	SSC	11154	affected	11154.p1	chr7:73240499-74746293	duplication	1505795	Sanders 2015	coding	25	ABHD11,BAZ1B,BCL7B,BUD23,CLDN3,CLDN4,CLIP2,DNAJC30,EIF4H,ELN,FKBP6,FZD9,GTF2I,GTF2IRD1,LAT2,LIMK1,METTL27,MLXIPL,NSUN5,RFC2,STX1A,TBL2,TMEM270,TRIM50,VPS37D
LINK	SSC	12134	affected	12134.p1	chr7:74531101-75149500	duplication	358124	Sanders 2015	coding	7	CASTOR2,GTF2I,GTF2IRD1,GTF2IRD2,GTF2IRD2B,NCF1,RCC1L
LINK	SSC	11676	affected	11676.p1	chr7:75427201-75430900	deletion	3700		inter-coding_intronic	1	POM121C
LINK	SSC	14604	affected	14604.p1	chr7:90362501-90367400	deletion	4900		inter-coding_intronic	1	GTPBP10
LINK	AGRE	AU1802202_AU1802201	affected	AU1802302	chr7:94956789-94960688	deletion	3900		inter-coding_intronic	1	PPP1R9A
LINK	SSC	13034	affected	13034.p1	chr7:95155101-95161000	deletion	5900		inter-coding_intronic	1	PPP1R9A
LINK	SSC	14224	unaffected	14224.s1	chr7:119798901-119832100	deletion	33200	Sanders 2015	noncoding	1	LINC02476
LINK	AGRE	AU3779202_AU3779201	affected	AU3779304	chr7:142631185-142633884	deletion	2700		intergenic	0
LINK	SSC	14478	unaffected	14478.s1	chr7:142686101-142690200	deletion	4100		intergenic	0
LINK	SSC	12152	unaffected	12152.s1	chr7:143928301-143931900	deletion	3600		intergenic	0
LINK	AGRE	AU1033202_AU1033201	affected	AU1033301	chr7:146417009-146419608	duplication	2600		inter-coding_intronic	1	CNTNAP2
LINK	AGRE	AU1891202_AU1891201	affected	AU1891301	chr7:152065116-152348142	duplication	283027		coding	2	GALNT11,KMT2C
LINK	SSC	11225	affected	11225.p1	chr8:4121001-4505800	deletion	384800	Sanders 2015	coding	1	CSMD1
LINK	SSC	13263	unaffected	13263.s1	chr8:5623601-5948464	deletion	324864	Sanders 2015	intergenic	0
LINK	AGRE	AU3127202_AU3127201	affected	AU3127302	chr8:10523091-10669211	deletion	146121		coding	2	PRSS55,RP1L1
LINK	SSC	13812	unaffected	13812.s1	chr8:11895501-11899300	deletion	3800		intergenic	0
LINK	SSC	14694	unaffected	14694.s1	chr8:16193454-16218525	deletion	25072	Sanders 2015	intergenic	0
LINK	SSC	13484	unaffected	13484.s1	chr8:28412497-28422399	deletion	9903		intergenic	0
LINK	SSC	12972	affected	12972.p1	chr8:30672701-30676700	deletion	4000		intergenic	0
LINK	SSC	11304	affected	11304.p1	chr8:34339901-34345300	deletion	5400		intergenic	0
LINK	AGRE	AU035001_AU035002	affected	AU035004	chr8:46772558-47729530	duplication	809073		coding	1	SPIDR
LINK	SSC	11445	affected	11445.p1	chr8:83793001-83802400	deletion	9400		intergenic	0
LINK	SSC	12680	affected	12680.p1	chr8:88538627-88569152	duplication	14328		intergenic	0
LINK	AGRE	AU2777202_AU2777201	affected	AU2777302	chr8:89339372-89371471	duplication	32100		intergenic	0
LINK	SSC	14465	unaffected	14465.s1	chr8:113259301-113262900	duplication	3600		inter-coding_intronic	1	CSMD3
LINK	SSC	13215	unaffected	13215.s1	chr8:117248501-117250600	deletion	2100		intergenic	0
LINK	AGRE	AU2885202_AU2885201	affected	AU2885301	chr8:119831761-119835060	deletion	3300		coding	2	DSCC1,TAF2
LINK	SSC	14661	affected	14661.p1	chr8:121430001-121439399	deletion	9399		intergenic	0
LINK	AGRE	AU2063202_AU2063201	affected	AU2063307	chr8:122367662-122396983	deletion	29322		intergenic	0
LINK	SSC	14558	affected	14558.p1	chr8:129992401-129996300	deletion	3900		peripheral	1	FAM49B
LINK	SSC	12871	unaffected	12871.s1	chr8:135669041-135912099	duplication	243059	Sanders 2015	intergenic	0
LINK	SSC	14185	unaffected	14185.s1	chr8:142739201-142943411	duplication	204211	Sanders 2015	coding	9	CYP11B1,CYP11B2,GML,LY6D,LYNX1,LYNX1-SLURP2,LYPD2,SLURP1,SLURP2
LINK	SSC	11258	affected	11258.p1	chr8:144403601-144417100	duplication	13500		coding	2	CPSF1,SLC39A4
LINK	SSC	14505	unaffected	14505.s1	chr9:727020-1345486	duplication	618467	Sanders 2015	coding	4	DMRT1,DMRT2,DMRT3,KANK1
LINK	SSC	11922	affected	11922.p1	chr9:3208401-3212100	deletion	3700		intergenic	0
LINK	SSC	11348	affected	11348.p1	chr9:13306701-13316760	deletion	10060	Sanders 2015	intergenic	0
LINK	SSC	14606	unaffected	14606.s1	chr9:19116201-19152500	duplication	36300		coding	1	PLIN2
LINK	AGRE	AU1842202_AU1842201	affected	AU1842303	chr9:26421748-26427802	deletion	6055		intergenic	0
LINK	SSC	14254	affected	14254.p1	chr9:69237901-74105500	deletion	4867600	Sanders 2015	coding	18	ABHD17B,ALDH1A1,ANXA1,APBA1,C9orf135,C9orf57,C9orf85,CEMIP2,FAM189A2,GDA,KLF9,MAMDC2,PTAR1,SMC5,TJP2,TMC1,TRPM3,ZFAND5
LINK	SSC	13601	unaffected	13601.s1	chr9:95973300-96002719	deletion	29420		coding	1	ERCC6L2
LINK	SSC	12420	unaffected	12420.s1	chr9:98623901-98626300	deletion	2400		inter-coding_intronic	1	GABBR2
LINK	SSC	11262	affected	11262.p1	chr9:106931801-106937768	deletion	5968		coding	1	ZNF462
LINK	SSC	13632	affected	13632.p1	chr9:122883901-122894151	deletion	10251		coding	1	RC3H2
LINK	SSC	12235	affected	12235.p1	chr9:128105349-128709200	duplication	603852	Sanders 2015	coding	19	C9orf16,CERCAM,CIZ1,COQ4,DNM1,GLE1,GOLGA2,LCN2,ODF2,PKN3,PTGES2,SET,SLC25A25,SLC27A4,SPTAN1,SWI5,TRUB2,URM1,WDR34
LINK	SSC	12100	unaffected	12100.s1	chr9:130650001-130655300	duplication	5300		intergenic	0
LINK	SSC	12370	affected	12370.p1	chr9:131903401-132064700	duplication	161300	Sanders 2015	coding	1	MED27
LINK	SSC	12153	unaffected	12153.s1	chr9:136957901-136961400	deletion	3500		intergenic	0
LINK	SSC	12581	affected	12581.p1	chr9:137440201-137448697	duplication	8497		peripheral	2	ENTPD8,NSMF
LINK	SSC	12581	affected	12581.p1	chr9:137785801-138185500	deletion	399700	Sanders 2015	coding	2	CACNA1B,EHMT1
LINK	SSC	13070	affected	13070.p1	chr10:485401-686700	duplication	201300		coding	2	DIP2C,PRR26
LINK	SSC	14572	unaffected	14572.s1	chr10:786601-1340200	duplication	553600	Sanders 2015	coding	6	ADARB2,GTPBP4,IDI1,IDI2,LARP4B,WDR37
LINK	SSC	14046	unaffected	14046.s1	chr10:13096001-13119300	deletion	23300	Sanders 2015	coding	1	OPTN
LINK	SSC	13862	affected	13862.p1	chr10:13913228-13941722	deletion	28495	Sanders 2015	inter-coding_intronic	1	FRMD4A
LINK	SSC	14211	unaffected	14211.s1	chr10:15248101-20441864	deletion	5193764	Sanders 2015	coding	20	ARL5B,C1QL3,CACNB2,CUBN,FAM171A1,HACD1,ITGA8,MALRD1,MINDY3,MRC1,NSUN6,PLXDC2,PTER,RSU1,SLC39A12,ST8SIA6,STAM,TMEM236,TRDMT1,VIM
LINK	AGRE	AU1664202_AU1664201	affected	AU1664302	chr10:21789772-21819227	duplication	29456		coding	1	DNAJC1
LINK	SSC	14610	affected	14610.p1	chr10:21883601-21930534	duplication	46934		coding	1	DNAJC1
LINK	SSC	14179	unaffected	14179.s1	chr10:34540280-34605941	duplication	65662		inter-coding_intronic	1	PARD3
LINK	SSC	12481	unaffected	12481.s1	chr10:38792201-38802000	deletion	9800		intergenic	0
LINK	SSC	13842	affected	13842.p1	chr10:45305001-45308900	deletion	3900		peripheral	1	OR13A1
LINK	SSC	12523	unaffected	12523.s1	chr10:45345501-45674700	duplication	329200		coding	3	ALOX5,MARCH8,ZFAND4
LINK	AGRE	AU032901_AU032902	affected	AU032903	chr10:49643277-60065041	duplication	10197235	Leppa 2016	coding	29	A1CF,AGAP6,ANK3,ASAH2,ASAH2B,BICC1,C10orf53,CCDC6,CHAT,CISD1,CSTF2T,DKK1,FAM13C,IPMK,MBL2,MRLN,MTRNR2L5,OGDHL,PARG,PCDH15,PHYHIPL,PRKG1,SGMS1,SLC16A9,TFAM,TIMM23B,UBE2D1,WASHC2A,ZWINT
LINK	SSC	12631	unaffected	12631.s1	chr10:66315101-66518394	deletion	203294	Sanders 2015	coding	1	CTNNA3
LINK	SSC	13505	affected	13505.p1	chr10:75436201-75438200	deletion	2000		inter-coding_intronic	1	LRMDA
LINK	SSC	12735	affected	12735.p1	chr10:76525601-76529600	deletion	4000		inter-coding_intronic	1	LRMDA
LINK	SSC	13812	unaffected	13812.s1	chr10:80974542-81010579	deletion	33768	Sanders 2015	intergenic	0
LINK	AGRE	AU1296202_AU1296201	affected	AU1296302	chr10:84525645-84531044	deletion	5400		intergenic	0
LINK	AGRE	AU1196202_AU1196201	affected	AU1196302	chr10:98639644-99173088	duplication	533445	Leppa 2016	coding	1	HPSE2
LINK	AGRE	AU2007202_AU2007201	affected	AU2007302	chr10:105026543-105029442	deletion	2900		inter-coding_intronic	1	SORCS3
LINK	SSC	13903	unaffected	13903.s1	chr10:105690501-105693000	deletion	2500		noncoding	1	LOC101927549
LINK	SSC	14616	affected	14616.p1	chr10:112613901-113475629	deletion	861729	Sanders 2015	coding	2	TCF7L2,VTI1A
LINK	SSC	11718	affected	11718.p1	chr10:118991427-119221337	duplication	229911	Sanders 2015	coding	6	EIF3A,FAM45A,GRK5,NANOS1,PRDX3,SFXN4
LINK	SSC	14590	unaffected	14590.s1	chr10:125085401-125087700	deletion	2300		peripheral	1	CTBP2
LINK	SSC	14247	unaffected	14247.s1	chr11:191279-283451	duplication	92173	Sanders 2015	coding	7	BET1L,NLRP6,ODF3,PSMD13,RIC8A,SCGB1C1,SIRT3
LINK	SSC	14467	affected	14467.p1	chr11:18358967-18365366	deletion	6400	Sanders 2015	coding	1	GTF2H1
LINK	SSC	14695	unaffected	14695.s1	chr11:34118419-34138507	deletion	20089		coding	1	NAT10
LINK	SSC	13148	affected	13148.p1	chr11:38992901-39004900	duplication	12000		intergenic	0
LINK	SSC	14270	affected	14270.p1	chr11:45926701-47081700	deletion	1155000	Sanders 2015	coding	15	AMBRA1,ARHGAP1,ATG13,C11orf49,CHRM4,CKAP5,CREB3L1,DGKZ,F2,HARBI1,LARGE2,LRP4,MDK,PHF21A,ZNF408
LINK	AGRE	AU2004202_AU2004203	affected	AU2004303	chr11:46609851-46615250	deletion	5400		inter-coding_intronic	1	HARBI1
LINK	AGRE	AU0412202_AU0412201	affected	AU0412303	chr11:50405430-50448680	duplication	43251		noncoding	1	LOC646813
LINK	SSC	11685	unaffected	11685.s1	chr11:69286301-69344800	deletion	58500		coding	1	MYEOV
LINK	SSC	12100	affected	12100.p1	chr11:72324501-72334700	deletion	10200		coding	1	CLPB
LINK	SSC	13611	unaffected	13611.s1	chr11:99527001-99643400	deletion	116400	Sanders 2015	coding	1	CNTN5
LINK	AGRE	AU1098202_AU1098201	affected	AU1098303	chr11:102002649-102007469	deletion	4821		intergenic	0
LINK	SSC	12975	affected	12975.p1	chr11:121392801-123018200	deletion	1625400	Sanders 2015	coding	6	BLID,BSX,CRTAM,JHY,SORL1,UBASH3B
LINK	SSC	14681	unaffected	14681.s1	chr11:122438501-122516951	duplication	78451	Sanders 2015	intergenic	0
LINK	SSC	14508	unaffected	14508.s1	chr11:132724001-132728400	deletion	4400		inter-coding_intronic	1	OPCML
LINK	AGRE	AU4056202_AU4056201	affected	AU4056301	chr12:81935-146234	deletion	64300		coding	1	IQSEC3
LINK	SSC	11714	affected	11714.p1	chr12:3548101-3556237	deletion	8137	Sanders 2015	coding	1	PRMT8
LINK	SSC	14473	unaffected	14473.s1	chr12:5962701-5988945	duplication	26245	Sanders 2015	coding	1	VWF
LINK	SSC	14473	unaffected	14473.s1	chr12:6021101-6113300	deletion	92200	Sanders 2015	coding	1	VWF
LINK	SSC	13608	affected	13608.p1	chr12:7822601-7839300	duplication	16700		coding	1	SLC2A14
LINK	SSC	13694	affected	13694.p1	chr12:25274272-25289145	deletion	14874	Sanders 2015	intergenic	0
LINK	SSC	14552	affected	14552.p1	chr12:42099401-42580400	duplication	481000	Sanders 2015	coding	5	GXYLT1,PPHLN1,PRICKLE1,YAF2,ZCRB1
LINK	SSC	13146	affected	13146.p1	chr12:76950001-76953500	deletion	3500		intergenic	0
LINK	SSC	14030	unaffected	14030.s1	chr12:85342101-85344400	duplication	2300		intergenic	0
LINK	SSC	11963	affected	11963.p1	chr12:96828040-96841343	duplication	13304		coding	1	CFAP54
LINK	SSC	14560	unaffected	14560.s1	chr12:99719201-99750000	deletion	30800		inter-coding_intronic	1	ANKS1B
LINK	SSC	11775	affected	11775.p1	chr12:104070701-104073000	duplication	2300		inter-coding_intronic	1	HCFC2
LINK	SSC	11004	affected	11004.p1	chr12:122132001-122161200	deletion	29200	Sanders 2015	coding	1	MLXIP
LINK	AGRE	AU2337202_AU2337201	affected	AU2337303	chr12:130581256-131208555	duplication	627300	Leppa 2016	coding	3	ADGRD1,RAN,STX2
LINK	SSC	14181	unaffected	14181.s1	chr13:19905301-19981900	duplication	76600		coding	1	ZMYM2
LINK	SSC	12821	unaffected	12821.s1	chr13:31548001-31555600	deletion	7600		intergenic	0
LINK	SSC	11038	affected	11038.p1	chr13:31779601-31787600	deletion	8000		coding	1	RXFP2
LINK	SSC	12343	affected	12343.p1	chr13:40523601-41343725	duplication	820125	Sanders 2015	coding	9	ELF1,FOXO1,KBTBD6,KBTBD7,MRPS31,MTRF1,NAA16,SLC25A15,WBP4
LINK	AGRE	AU1894203_AU1894201	affected	AU1894303	chr13:49602565-49606164	deletion	3600		intergenic	0
LINK	SSC	11537	unaffected	11537.s1	chr13:60802801-60807900	deletion	5100		intergenic	0
LINK	SSC	12550	unaffected	12550.s1	chr13:78154001-78158600	duplication	4600		noncoding	1	RNF219-AS1
LINK	AGRE	AU4089202_AU4089201	affected	AU4089301	chr13:81527166-81558965	deletion	31800		intergenic	0
LINK	AGRE	AU2617202_AU2617201	affected	AU2617302	chr13:87681446-87712166	deletion	30721		intergenic	0
LINK	SSC	11472	unaffected	11472.s1	chr13:101584701-101627100	deletion	42400	Sanders 2015	coding	1	ITGBL1
LINK	SSC	11380	affected	11380.p1	chr13:105111901-105162854	duplication	50954	Sanders 2015	intergenic	0
LINK	SSC	13332	affected	13332.p1	chr13:107708201-107733800	deletion	25600		inter-coding_intronic	1	FAM155A
LINK	SSC	14432	unaffected	14432.s1	chr13:108869901-108872100	deletion	2200		inter-coding_intronic	1	MYO16
LINK	SSC	12426	unaffected	12426.s1	chr14:39510801-39751400	deletion	240600	Sanders 2015	intergenic	0
LINK	AGRE	AU4235202_AU4235201	affected	AU4235301	chr14:41119196-41123467	deletion	4272		noncoding	1	LINC02315
LINK	SSC	14204	unaffected	14204.s1	chr14:41391101-41396900	deletion	5800		intergenic	0
LINK	SSC	11788	unaffected	11788.s1	chr14:44605601-44619000	deletion	13400		intergenic	0
LINK	AGRE	AU1756202_AU1756201	affected	AU1756301	chr14:54229883-54239504	deletion	9622		intergenic	0
LINK	AGRE	AU3369202_AU3369201	affected	AU3369302	chr14:58204069-58210435	duplication	6367		coding	1	ACTR10
LINK	SSC	14114	affected	14114.p1	chr14:65690063-65705900	deletion	15838		inter-coding_intronic	1	FUT8
LINK	AGRE	AU002801_AU002802	affected	AU002804	chr14:70326984-70771483	duplication	444500		coding	8	ADAM20,ADAM21,COX16,MAP3K9,MED6,SYNJ2BP,SYNJ2BP-COX16,TTC9
LINK	AGRE	AU1510202_AU1510201	affected	AU1510303	chr14:96492355-96496263	deletion	3909		intergenic	0
LINK	SSC	13907	affected	13907.p1	chr14:102595201-102599400	deletion	4200		inter-coding_intronic	1	RCOR1
LINK	SSC	13589	affected	13589.p1	chr14:104392935-104505700	duplication	112766	Sanders 2015	intergenic	0
LINK	SSC	14159	affected	14159.p1	chr15:23364101-28345675	duplication	4930794	Sanders 2015	coding	15	ATP10A,GABRA5,GABRB3,GABRG3,GOLGA6L2,GOLGA8S,HERC2,MAGEL2,MKRN3,NDN,NPAP1,OCA2,SNRPN,SNURF,UBE3A
LINK	AGRE	AU1042202_AU1042201	affected	AU1042303	chr15:23430715-28343827	duplication	4515445	Leppa 2016	coding	14	ATP10A,GABRA5,GABRB3,GABRG3,GOLGA6L2,HERC2,MAGEL2,MKRN3,NDN,NPAP1,OCA2,SNRPN,SNURF,UBE3A
LINK	AGRE	AU4007202_AU4007201	affected	AU4007301	chr15:23432884-28302029	duplication	4087383	Leppa 2016	coding	14	ATP10A,GABRA5,GABRB3,GABRG3,GOLGA6L2,HERC2,MAGEL2,MKRN3,NDN,NPAP1,OCA2,SNRPN,SNURF,UBE3A
LINK	AGRE	AU013201_AU013202	affected	AU013203	chr15:23565987-23719653	duplication	153667		coding	3	MAGEL2,MKRN3,NDN
LINK	AGRE	AU013201_AU013202	affected	AU013204	chr15:23566153-23719453	duplication	153301		coding	3	MAGEL2,MKRN3,NDN
LINK	SSC	13355	affected	13355.p1	chr15:26722901-27307300	duplication	584400	Sanders 2015	coding	3	GABRA5,GABRB3,GABRG3
LINK	SSC	14531	affected	14531.p1	chr15:28746501-30955500	duplication	520315	Sanders 2015	coding	16	APBA2,ARHGAP11B,CHRFAM7A,FAM189A1,FAN1,GOLGA6L7,GOLGA8H,GOLGA8J,GOLGA8N,GOLGA8Q,GOLGA8R,GOLGA8T,LOC100996413,MTMR10,NSMCE3,TJP1
LINK	SSC	11928	affected	11928.p1	chr15:30613901-32154735	duplication	1540835	Sanders 2015	coding	10	ARHGAP11B,CHRNA7,FAN1,GOLGA8H,GOLGA8N,KLF13,LOC283710,MTMR10,OTUD7A,TRPM1
LINK	AGRE	AU2792202_AU2792201	affected	AU2792302	chr15:33829939-33854024	deletion	24086		coding	1	RYR3
LINK	SSC	14308	affected	14308.p1	chr15:53604701-53612476	deletion	7776		coding	1	WDR72
LINK	SSC	13604	affected	13604.p1	chr15:53689101-53691900	deletion	2800		inter-coding_intronic	1	WDR72
LINK	SSC	11233	affected	11233.p1	chr15:68807301-73859200	deletion	5051900	Sanders 2015	coding	34	ADPGK,ANP32A,ARIH1,BBS4,CD276,CELF6,CT62,GLCE,GOLGA6B,GRAMD2A,HCN4,HEXA,HIGD2B,INSYN1,KIF23,LARP6,LRRC49,MYO9A,NEO1,NOX5,NPTN,NR2E3,PAQR5,PARP6,PKM,REC114,RPLP1,SENP8,SPESP1,THAP10,THSD4,TLE3,TMEM202,UACA
LINK	AGRE	AU1652202_AU1652201	affected	AU1652301	chr15:74881560-74909392	duplication	27833		coding	2	FAM219B,MPI
LINK	SSC	13314	affected	13314.p1	chr15:92940901-92945600	deletion	4700		coding	1	CHD2
LINK	AGRE	AU1772202_AU1772201	affected	AU1772301	chr15:93345472-93448771	deletion	103300		intergenic	0
LINK	SSC	11042	unaffected	11042.s1	chr15:93755201-93797400	deletion	42200	Sanders 2015	intergenic	0
LINK	AGRE	AU1305202_AU1305201	affected	AU1305303	chr15:94193172-94206260	deletion	13089		intergenic	0
LINK	SSC	13465	affected	13465.p1	chr15:95927401-96080335	duplication	152935	Sanders 2015	intergenic	0
LINK	SSC	14443	affected	14443.p1	chr15:98936210-99462439	duplication	526230	Sanders 2015	coding	5	IGF1R,LRRC28,PGPEP1L,SYNM,TTC23
LINK	SSC	11435	affected	11435.p1	chr16:32304-1264400	deletion	1232097	Sanders 2015	coding	55	ARHGDIG,AXIN1,C1QTNF8,CACNA1H,CAPN15,CCDC78,CHTF18,CIAO3,DECR2,FAM173A,FAM234A,FBXL16,GNG13,HAGHL,HBA1,HBA2,HBM,HBQ1,HBZ,JMJD8,LMF1,LUC7L,MCRIP2,METRN,METTL26,MPG,MRPL28,MSLN,NHLRC4,NME4,NPRL3,PDIA2,PIGQ,POLR3K,PRR25,PRR35,RAB11FIP3,RAB40C,RGS11,RHBDF1,RHBDL1,RHOT2,RPUSD1,SNRNP25,SOX8,SSTR5,STUB1,TMEM8A,TPSAB1,TPSB2,TPSD1,TPSG1,WDR24,WDR90,WFIKKN1
LINK	AGRE	AU010901_AU010902	affected	AU010904	chr16:628401-654300	deletion	25900		coding	4	MCRIP2,METTL26,WDR90,WFIKKN1
LINK	SSC	14134	affected	14134.p1	chr16:2292001-2295900	deletion	3900		coding	1	ABCA3
LINK	SSC	12984	affected	12984.p1	chr16:3424701-3455500	deletion	30800	Sanders 2015	coding	2	NAA60,ZNF597
LINK	SSC	11551	affected	11551.p1	chr16:8715232-9208187	duplication	492956	Sanders 2015	coding	6	ABAT,C16orf72,CARHSP1,PMM2,TMEM186,USP7
LINK	SSC	11168	affected	11168.p1	chr16:8806101-9152412	duplication	346312	Sanders 2015	coding	4	C16orf72,CARHSP1,PMM2,USP7
LINK	SSC	14638	affected	14638.p1	chr16:24714401-27418700	duplication	1168104	Sanders 2015	coding	12	AQP8,ARHGAP17,C16orf82,HS3ST4,IL21R,IL4R,KDM8,LCMT1,NSMCE1,SLC5A11,TNRC6A,ZKSCAN2
LINK	SSC	13416	affected	13416.p1	chr16:28743701-29052769	deletion	309069	Sanders 2015	coding	10	ATP2A1,ATXN2L,CD19,LAT,NFATC2IP,NPIPB9,RABEP2,SH2B1,SPNS1,TUFM
LINK	SSC	12435	affected	12435.p1	chr16:29523777-30189981	duplication	666205	Sanders 2015	coding	28	ALDOA,ASPHD1,C16orf54,C16orf92,CDIPT,CORO1A,DOC2A,FAM57B,GDPD3,HIRIP3,INO80E,KCTD13,KIF22,LOC112694756,MAPK3,MAZ,MVP,PAGR1,PPP4C,PRRT2,QPRT,SEZ6L2,SPN,TAOK2,TBX6,TMEM219,YPEL3,ZG16
LINK	SSC	12100	affected	12100.p1	chr16:29532431-30188900	deletion	656470	Sanders 2015	coding	28	ALDOA,ASPHD1,C16orf54,C16orf92,CDIPT,CORO1A,DOC2A,FAM57B,GDPD3,HIRIP3,INO80E,KCTD13,KIF22,LOC112694756,MAPK3,MAZ,MVP,PAGR1,PPP4C,PRRT2,QPRT,SEZ6L2,SPN,TAOK2,TBX6,TMEM219,YPEL3,ZG16
LINK	SSC	13335	affected	13335.p1	chr16:29536287-30189981	duplication	653695	Sanders 2015	coding	28	ALDOA,ASPHD1,C16orf54,C16orf92,CDIPT,CORO1A,DOC2A,FAM57B,GDPD3,HIRIP3,INO80E,KCTD13,KIF22,LOC112694756,MAPK3,MAZ,MVP,PAGR1,PPP4C,PRRT2,QPRT,SEZ6L2,SPN,TAOK2,TBX6,TMEM219,YPEL3,ZG16
LINK	SSC	14023	affected	14023.p1	chr16:29536287-30190504	duplication	654218	Sanders 2015	coding	28	ALDOA,ASPHD1,C16orf54,C16orf92,CDIPT,CORO1A,DOC2A,FAM57B,GDPD3,HIRIP3,INO80E,KCTD13,KIF22,LOC112694756,MAPK3,MAZ,MVP,PAGR1,PPP4C,PRRT2,QPRT,SEZ6L2,SPN,TAOK2,TBX6,TMEM219,YPEL3,ZG16
LINK	SSC	12451	affected	12451.p1	chr16:29545142-30188900	deletion	643759	Sanders 2015	coding	28	ALDOA,ASPHD1,C16orf54,C16orf92,CDIPT,CORO1A,DOC2A,FAM57B,GDPD3,HIRIP3,INO80E,KCTD13,KIF22,LOC112694756,MAPK3,MAZ,MVP,PAGR1,PPP4C,PRRT2,QPRT,SEZ6L2,SPN,TAOK2,TBX6,TMEM219,YPEL3,ZG16
LINK	SSC	11433	affected	11433.p1	chr16:29545142-30189981	deletion	644840	Sanders 2015	coding	28	ALDOA,ASPHD1,C16orf54,C16orf92,CDIPT,CORO1A,DOC2A,FAM57B,GDPD3,HIRIP3,INO80E,KCTD13,KIF22,LOC112694756,MAPK3,MAZ,MVP,PAGR1,PPP4C,PRRT2,QPRT,SEZ6L2,SPN,TAOK2,TBX6,TMEM219,YPEL3,ZG16
LINK	SSC	12308	affected	12308.p1	chr16:29545142-30189981	deletion	644840	Sanders 2015	coding	28	ALDOA,ASPHD1,C16orf54,C16orf92,CDIPT,CORO1A,DOC2A,FAM57B,GDPD3,HIRIP3,INO80E,KCTD13,KIF22,LOC112694756,MAPK3,MAZ,MVP,PAGR1,PPP4C,PRRT2,QPRT,SEZ6L2,SPN,TAOK2,TBX6,TMEM219,YPEL3,ZG16
LINK	SSC	11090	affected	11090.p1	chr16:29545142-30190504	deletion	645363	Sanders 2015	coding	28	ALDOA,ASPHD1,C16orf54,C16orf92,CDIPT,CORO1A,DOC2A,FAM57B,GDPD3,HIRIP3,INO80E,KCTD13,KIF22,LOC112694756,MAPK3,MAZ,MVP,PAGR1,PPP4C,PRRT2,QPRT,SEZ6L2,SPN,TAOK2,TBX6,TMEM219,YPEL3,ZG16
LINK	SSC	12647	affected	12647.p1	chr16:29545142-30191700	duplication	646559	Sanders 2015	coding	28	ALDOA,ASPHD1,C16orf54,C16orf92,CDIPT,CORO1A,DOC2A,FAM57B,GDPD3,HIRIP3,INO80E,KCTD13,KIF22,LOC112694756,MAPK3,MAZ,MVP,PAGR1,PPP4C,PRRT2,QPRT,SEZ6L2,SPN,TAOK2,TBX6,TMEM219,YPEL3,ZG16
LINK	SSC	11540	affected	11540.p1	chr16:29547579-30188800	deletion	641222	Sanders 2015	coding	28	ALDOA,ASPHD1,C16orf54,C16orf92,CDIPT,CORO1A,DOC2A,FAM57B,GDPD3,HIRIP3,INO80E,KCTD13,KIF22,LOC112694756,MAPK3,MAZ,MVP,PAGR1,PPP4C,PRRT2,QPRT,SEZ6L2,SPN,TAOK2,TBX6,TMEM219,YPEL3,ZG16
LINK	SSC	12643	unaffected	12643.s1	chr16:51934201-51943700	deletion	9500		intergenic	0
LINK	SSC	11809	unaffected	11809.s1	chr16:61786101-61802698	duplication	16598		coding	1	CDH8
LINK	SSC	13815	affected	13815.p1	chr16:76212301-76482200	deletion	269900	Sanders 2015	coding	1	CNTNAP4
LINK	SSC	12383	affected	12383.p1	chr16:77909701-77998815	deletion	89115	Sanders 2015	coding	1	VAT1L
LINK	SSC	13993	affected	13993.p1	chr16:81031601-81210700	deletion	179100	Sanders 2015	coding	5	ATMIN,C16orf46,CENPN,GCSH,PKD1L2
LINK	SSC	11327	affected	11327.p1	chr16:81144501-86159600	deletion	5015100	Sanders 2015	coding	36	ADAD2,ATP2C2,BCO1,C16orf74,CDH13,CMIP,COTL1,COX4I1,CRISPLD2,DNAAF1,EMC8,FAM92B,GAN,GINS2,GSE1,HSBP1,HSD17B2,HSDL1,IRF8,KCNG4,KIAA0513,KLHL36,MBTPS1,MEAK7,MLYCD,MPHOSPH6,NECAB2,OSGIN1,PKD1L2,PLCG2,SDR42E1,SLC38A8,TAF1C,USP10,WFDC1,ZDHHC7
LINK	SSC	14475	affected	14475.p1	chr16:83127201-83203200	deletion	76000	Sanders 2015	coding	1	CDH13
LINK	AGRE	AU1072202_AU1072201	affected	AU1072303	chr16:83921996-84092002	deletion	170007		coding	4	MBTPS1,NECAB2,OSGIN1,SLC38A8
LINK	SSC	12613	unaffected	12613.s1	chr16:84203001-84205400	deletion	2400		intergenic	0
LINK	SSC	13874	unaffected	13874.s1	chr16:84413362-84495119	deletion	81758	Sanders 2015	coding	2	ATP2C2,MEAK7
LINK	SSC	14412	unaffected	14412.s1	chr16:89740401-89753952	duplication	13552	Sanders 2015	coding	1	FANCA
LINK	SSC	14226	affected	14226.p1	chr17:1064004-1709900	duplication	645897	Sanders 2015	coding	13	ABR,BHLHA9,CRK,INPP5K,MYO1C,PITPNA,PRPF8,RILP,SCARF1,SLC43A2,TLCD2,TRARG1,YWHAE
LINK	SSC	12243	affected	12243.p1	chr17:1612601-1620251	deletion	7651		coding	1	SLC43A2
LINK	SSC	13555	affected	13555.p1	chr17:14185901-15582900	deletion	1397000	Sanders 2015	coding	9	CDRT1,CDRT15,CDRT4,COX10,HS3ST3B1,PMP22,TEKT3,TVP23C,TVP23C-CDRT4
LINK	SSC	13561	affected	13561.p1	chr17:15964201-18070300	duplication	2106100	Sanders 2015	coding	28	ADORA2B,ATPAF2,CCDC144A,CENPV,COPS3,DRC3,FAM106CP,FLCN,GID4,LRRC75A,MED9,MPRIP,NCOR1,NT5M,PEMT,PIGL,PLD6,RAI1,RASD1,SREBF1,TNFRSF13B,TOM1L2,TRPV2,TTC19,UBB,ZNF287,ZNF624,ZSWIM7
LINK	AGRE	AU3124202_AU3124201	affected	AU3124301	chr17:28942264-28947657	deletion	5394		inter-coding_intronic	1	PHF12
LINK	SSC	13133	affected	13133.p1	chr17:29677780-29689920	deletion	12141		coding	1	SSH2
LINK	SSC	14459	affected	14459.p1	chr17:30621301-30873900	duplication	252600	Sanders 2015	coding	2	ATAD5,CRLF3
LINK	SSC	11353	affected	11353.p1	chr17:36375801-37905300	deletion	1529500	Sanders 2015	coding	22	AATF,ACACA,C17orf78,DDX52,DHRS11,DUSP14,GGNBP2,HNF1B,LHX1,MRM1,MYO19,PIGW,SYNRG,TADA2A,TBC1D3D,TBC1D3F,TBC1D3G,TBC1D3H,TBC1D3I,TBC1D3J,TBC1D3K,ZNHIT3
LINK	SSC	14643	affected	14643.p1	chr17:36441101-37900227	deletion	1459127	Sanders 2015	coding	20	AATF,ACACA,C17orf78,DDX52,DHRS11,DUSP14,GGNBP2,HNF1B,LHX1,MRM1,MYO19,PIGW,SYNRG,TADA2A,TBC1D3D,TBC1D3G,TBC1D3H,TBC1D3I,TBC1D3J,ZNHIT3
LINK	AGRE	AU1355202_AU1355201	affected	AU1355301	chr17:41725949-43439532	duplication	1634700	Leppa 2016	coding	61	AARSD1,ACLY,AOC2,AOC3,ARL4D,ATP6V0A1,BECN1,BRCA1,C17orf113,CAVIN1,CCDC200,CCR10,CNP,CNTD1,CNTNAP1,COA3,COASY,DHX58,DNAJC7,EZH1,FKBP10,G6PC,GHDC,HAP1,HCRT,HSD17B1,HSPB9,IFI35,JUP,KAT2A,KCNH4,KLHL10,KLHL11,MLX,NAGLU,NBR1,NKIRAS2,NT5C3B,P3H4,PLEKHH3,PSMC3IP,PSME3,PTGES3L,PTGES3L-AARSD1,RAB5C,RAMP2,RETREG3,RND2,RPL27,RUNDC1,STAT3,STAT5A,STAT5B,TMEM106A,TTC25,TUBG1,TUBG2,VAT1,VPS25,WNK4,ZNF385C
LINK	SSC	12221	affected	12221.p1	chr17:43121544-43128023	duplication	6480		coding	1	BRCA1
LINK	SSC	12221	unaffected	12221.s1	chr17:43121544-43128023	duplication	6480		coding	1	BRCA1
LINK	SSC	11982	affected	11982.p1	chr17:46703246-47019504	duplication	316259	Sanders 2015	coding	5	GOSR2,NSF,RPRML,WNT3,WNT9B
LINK	SSC	12117	unaffected	12117.s1	chr17:60013101-62264865	duplication	2251765	Sanders 2015	coding	14	APPBP2,BCAS3,BRIP1,C17orf64,C17orf82,CA4,HEATR6,INTS2,MED13,NACA2,PPM1D,TBX2,TBX4,USP32
LINK	SSC	14084	affected	14084.p1	chr17:75440378-76582968	deletion	1139518	Sanders 2015	coding	39	AANAT,ACOX1,CASKIN2,CDK3,CYGB,EVPL,EXOC7,FBF1,FOXJ1,GALK1,GALR2,H3F3B,ITGB4,LLGL2,MRPL38,MYO15B,PRCD,PRPSAP1,QRICH2,RECQL5,RHBDF2,RNF157,SAP30BP,SMIM5,SMIM6,SPHK1,SRP68,ST6GALNAC2,TEN1,TMEM94,TRIM47,TRIM65,TSEN54,UBALD2,UBE2O,UNC13D,UNK,WBP2,ZACN
LINK	SSC	13162	affected	13162.p1	chr18:28930801-28933700	deletion	2900		intergenic	0
LINK	SSC	12585	unaffected	12585.s1	chr18:34594101-34600300	deletion	6200		peripheral	1	DTNA
LINK	SSC	13972	unaffected	13972.s1	chr18:38755701-38758500	deletion	2800		intergenic	0
LINK	SSC	13547	affected	13547.p1	chr18:76567079-76573734	deletion	6656		intergenic	0
LINK	SSC	12295	unaffected	12295.s1	chr19:609155-927182	duplication	318028	Sanders 2015	coding	17	AZU1,CFD,ELANE,FGF22,FSTL3,HCN2,KISS1R,MED16,MISP,PALM,PLPPR3,POLRMT,PRSS57,PRTN3,PTBP1,R3HDM4,RNF126
LINK	SSC	14601	unaffected	14601.s1	chr19:2875201-2918800	deletion	43600	Sanders 2015	coding	2	ZNF556,ZNF57
LINK	AGRE	AU1178202_AU1178201	affected	AU1178302	chr19:7919616-7925515	deletion	5900		coding	2	CTXN1,SNAPC2
LINK	SSC	13018	affected	13018.p1	chr19:14938612-15781333	duplication	842722	Sanders 2015	coding	21	AKAP8,AKAP8L,BRD4,CASP14,CCDC105,CYP4F12,CYP4F22,CYP4F3,CYP4F8,EPHX3,ILVBL,NOTCH3,OR10H2,OR10H3,OR1I1,OR7C2,PGLYRP2,RASAL3,SLC1A6,SYDE1,WIZ
LINK	SSC	14313	affected	14313.p1	chr19:17925201-17928200	duplication	3000		intergenic	0
LINK	SSC	14662	unaffected	14662.s1	chr19:34171301-34176100	deletion	4800		coding	1	LSM14A
LINK	SSC	13335	affected	13335.p1	chr19:37138752-37144828	deletion	6077		intergenic	0
LINK	SSC	11193	unaffected	11193.s1	chr19:37425301-37464344	deletion	39044	Sanders 2015	coding	1	ZNF569
LINK	SSC	12076	affected	12076.p1	chr19:38673801-38677300	deletion	3500		inter-coding_intronic	1	ACTN4
LINK	AGRE	AU3175202_AU3175201	affected	AU3175303	chr19:44378642-44452414	duplication	73800		coding	2	ZNF229,ZNF285
LINK	SSC	13874	affected	13874.p1	chr19:47132506-47184135	duplication	49477		coding	1	SAE1
LINK	SSC	14668	unaffected	14668.s1	chr19:47151001-47154000	deletion	3000		coding	1	SAE1
LINK	SSC	13306	unaffected	13306.s1	chr19:48820101-48846600	duplication	26500		coding	2	HSD17B14,PLEKHA4
LINK	SSC	11441	unaffected	11441.s1	chr19:49719682-49737792	deletion	18111		intergenic	0
LINK	SSC	11986	unaffected	11986.s1	chr19:50909701-50915300	deletion	5600		coding	1	KLK4
LINK	AGRE	AU3175202_AU3175201	affected	AU3175303	chr19:52958348-53197247	deletion	238900		coding	6	ERVV-1,ERVV-2,ZNF160,ZNF347,ZNF415,ZNF665
LINK	SSC	14513	affected	14513.p1	chr19:54964236-57146715	duplication	2182480	Sanders 2015	coding	68	BRSK1,CCDC106,COX6B2,DNAAF3,EDDM13,EPN1,EPS8L1,FAM71E2,FIZ1,GALP,GP6,HSPBP1,IL11,ISOC2,KMT5C,NAT14,NLRP11,NLRP13,NLRP2,NLRP4,NLRP5,NLRP8,NLRP9,PEG3,PPP1R12C,PPP6R1,PTPRH,RDH13,RFPL4A,RFPL4AL1,RPL28,SBK2,SBK3,SHISA7,SMIM17,SSC5D,SYT5,TMEM150B,TMEM190,TMEM238,TMEM86B,TNNI3,TNNT1,U2AF2,UBE2S,USP29,ZFP28,ZIM2,ZIM3,ZNF444,ZNF470,ZNF471,ZNF524,ZNF579,ZNF580,ZNF581,ZNF582,ZNF583,ZNF628,ZNF667,ZNF71,ZNF7…
LINK	SSC	14459	affected	14459.p1	chr19:55020752-55045900	duplication	25149	Sanders 2015	coding	2	GP6,RDH13
LINK	SSC	13177	affected	13177.p1	chr20:494101-497100	deletion	3000		coding	1	CSNK2A1
LINK	AGRE	AU0976202_AU0976201	affected	AU0976301	chr20:871058-873957	deletion	2900		coding	1	ANGPT4
LINK	AGRE	AU1667101_AU1667102	affected	AU1667201	chr20:2490455-2495554	deletion	5100		coding	1	ZNF343
LINK	AGRE	AU2458202_AU2458201	affected	AU2458302	chr20:14893755-14954254	deletion	60500		inter-coding_intronic	1	MACROD2
LINK	SSC	13023	unaffected	13023.s1	chr20:18293321-18304651	duplication	11331		coding	1	ZNF133
LINK	SSC	13023	affected	13023.p1	chr20:18321136-18329677	duplication	8542		intergenic	0
LINK	SSC	13903	unaffected	13903.s1	chr20:25935173-25974376	deletion	39204		noncoding	1	LINC01733
LINK	SSC	14661	affected	14661.p1	chr20:44226501-44230500	duplication	4000		intergenic	0
LINK	SSC	14661	unaffected	14661.s1	chr20:44226601-44230500	duplication	3900		intergenic	0
LINK	SSC	14070	unaffected	14070.s1	chr20:46410001-46412700	deletion	2700		noncoding	1	LOC105372633
LINK	SSC	14207	affected	14207.p1	chr20:60194583-60206931	duplication	12349		noncoding	1	MIR646HG
LINK	SSC	13842	affected	13842.p1	chr20:62003601-62010374	deletion	6774		coding	1	TAF4
LINK	SSC	13048	unaffected	13048.s1	chr21:20815001-20822700	deletion	7700		intergenic	0
LINK	SSC	12618	affected	12618.p1	chr21:35237801-35245100	deletion	7300		intergenic	0
LINK	SSC	13626	affected	13626.p1	chr21:40073901-40085400	deletion	11500		coding	1	DSCAM
LINK	SSC	13328	affected	13328.p1	chr22:17927001-17929600	deletion	2600		peripheral	1	MICAL3
LINK	SSC	13859	affected	13859.p1	chr22:18943389-20689097	deletion	1745709	Sanders 2015	coding	32	ARVCF,C22orf39,CCDC188,CDC45,CLDN5,CLTCL1,COMT,DGCR2,DGCR6L,DGCR8,ESS2,GNB1L,GP1BB,GSC2,HIRA,KLHL22,MED15,MRPL40,RANBP1,RTL10,RTN4R,SCARF2,SEPT5,SLC25A1,TANGO2,TBX1,TRMT2A,TSSK2,TXNRD2,UFD1,ZDHHC8,ZNF74
LINK	SSC	14330	affected	14330.p1	chr22:18943761-21112032	duplication	2168272	Sanders 2015	coding	42	AIFM3,ARVCF,C22orf39,CCDC188,CDC45,CLDN5,CLTCL1,COMT,CRKL,DGCR2,DGCR6L,DGCR8,ESS2,GNB1L,GP1BB,GSC2,HIRA,KLHL22,LRRC74B,LZTR1,MED15,MRPL40,P2RX6,PI4KA,RANBP1,RTL10,RTN4R,SCARF2,SEPT5,SERPIND1,SLC25A1,SLC7A4,SNAP29,TANGO2,TBX1,THAP7,TRMT2A,TSSK2,TXNRD2,UFD1,ZDHHC8,ZNF74
LINK	SSC	14468	unaffected	14468.s1	chr22:18945212-21114754	deletion	2169543	Sanders 2015	coding	42	AIFM3,ARVCF,C22orf39,CCDC188,CDC45,CLDN5,CLTCL1,COMT,CRKL,DGCR2,DGCR6L,DGCR8,ESS2,GNB1L,GP1BB,GSC2,HIRA,KLHL22,LRRC74B,LZTR1,MED15,MRPL40,P2RX6,PI4KA,RANBP1,RTL10,RTN4R,SCARF2,SEPT5,SERPIND1,SLC25A1,SLC7A4,SNAP29,TANGO2,TBX1,THAP7,TRMT2A,TSSK2,TXNRD2,UFD1,ZDHHC8,ZNF74
LINK	SSC	11236	unaffected	11236.s1	chr22:28312101-28321700	deletion	9600		inter-coding_intronic	1	TTC28
LINK	SSC	13496	unaffected	13496.s1	chr22:29206101-29220210	duplication	14110		coding	1	EMID1
LINK	SSC	12224	affected	12224.p1	chr22:40099401-40374600	deletion	275200	Sanders 2015	coding	2	ADSL,TNRC6B
LINK	SSC	12618	unaffected	12618.s1	chr22:40836501-40842800	deletion	6300		coding	1	ST13
LINK	SSC	11099	unaffected	11099.s1	chr22:44456201-44460200	deletion	4000		intergenic	0
LINK	SSC	13620	affected	13620.p1	chr22:44482101-44484300	deletion	2200		intergenic	0
LINK	SSC	14232	affected	14232.p1	chr22:47793301-50800000	deletion	3006700	Sanders 2015	coding	38	ACR,ADM2,ALG12,ARSA,BRD1,C22orf34,CHKB,CPT1B,CRELD2,DENND6B,FAM19A5,HDAC10,IL17REL,KLHDC7B,LMF2,MAPK11,MAPK12,MAPK8IP2,MIOX,MLC1,MOV10L1,NCAPH2,ODF3B,PANX2,PIM3,PLXNB2,PPP6R2,RABL2B,SBF1,SCO2,SELENOO,SHANK3,SYCE3,TRABD,TTLL8,TUBGCP6,TYMP,ZBED4
LINK	AGRE	AU1773202_AU1773201	affected	AU1773302	chr22:50683762-50801529	deletion	117768		coding	3	ACR,RABL2B,SHANK3

## Sheet: Description
Description
The table lists the de novo CNV variants identified in the children of SSC and AGRE collections that pass the cell-line genetic drift filters.
Column	Definition
UCSCLink	link to the UCSC Genome Browser
collection	AGRE or SSC
familyId	family ID in the collection
in affected status	role of the sample, ‘affected’ or ‘unaffected’ for affected proband or unaffected sibling, respectively
personIds	Person IDs in the collection
location	Genomic location of the CNV with format: chr N:B-E where N is the chromosome name, B is the start position and E is the end position (e.g. chr1:1305145-1314126)
variant	deletion or duplication
publication	“Sanders 2015”, “Leppa 2016”, or empty if the CNV has not been published
genomic region	genomic region of “intergenic”, “coding”, “inter-coding_intronic”, “noncoding”, and “peripheral” See Figure 2 for definition of the term.
number of genes	number of genes overlapping with the CNV
genes	list of genes overlapping with the CNV
